# Supplementary material
Source: bioRxiv or medRxiv preprint supplement (https://www.biorxiv.org/content/biorxiv/early/2020/10/09/2020.10.08.331256/DC1/embed/media-1.pdf)
Supplement: Supplementary file [file media-1.pdf]

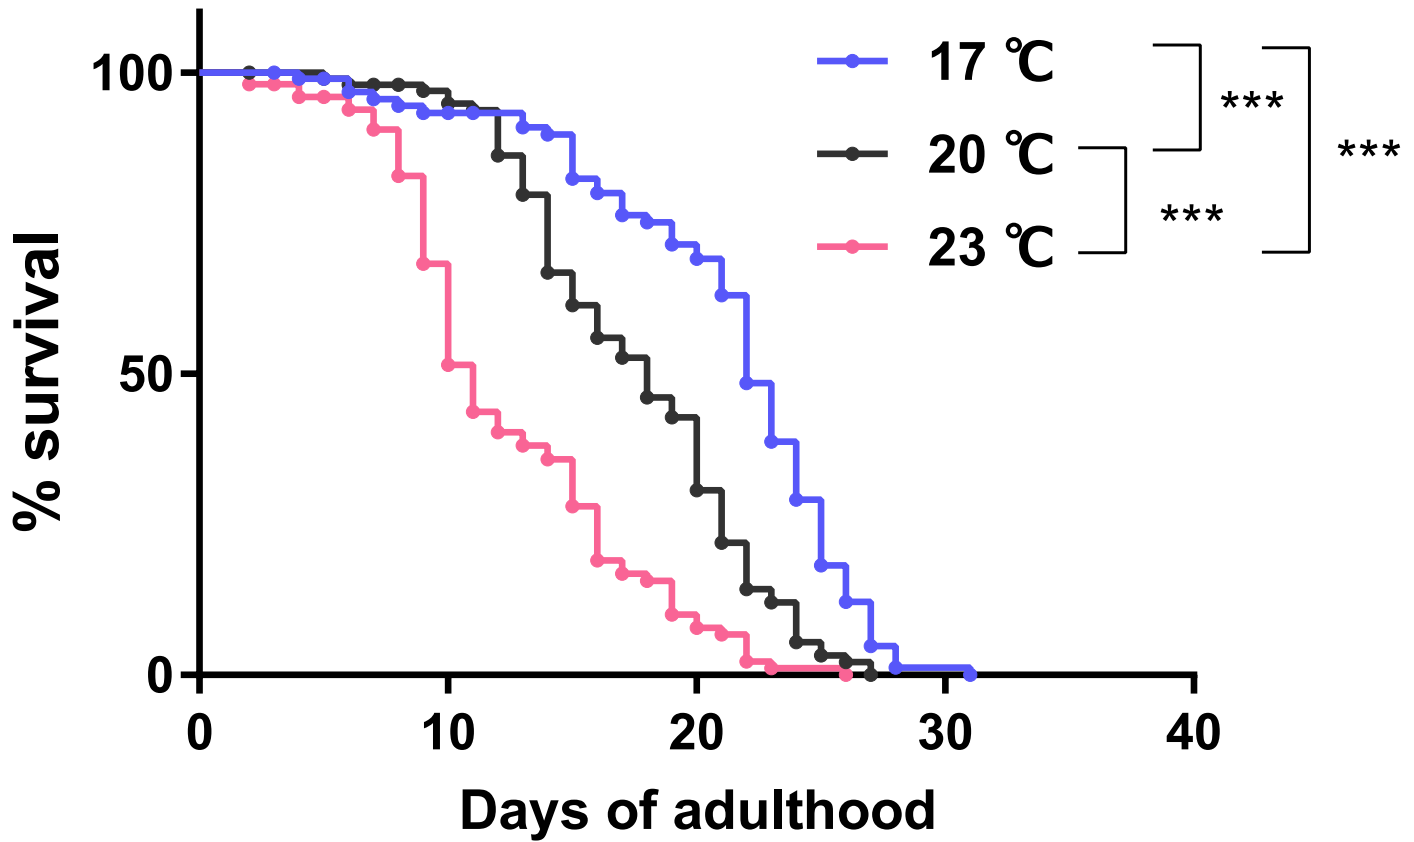

**Figure S1 Survival curve of worms cultivated at different temperature**

Survival curves of worms cultivated at indicated temperature from eggs. Worms were fed *E. coli* on NGM plates. n=4 experiments with 25 worms/experiment. Statistics: Log-rank test, p\*\*\*<0.001.

$T_{\text{cult}} = 23 \text{ }^{\circ}\text{C}$ ,  $20 \text{ }^{\circ}\text{C}$  center

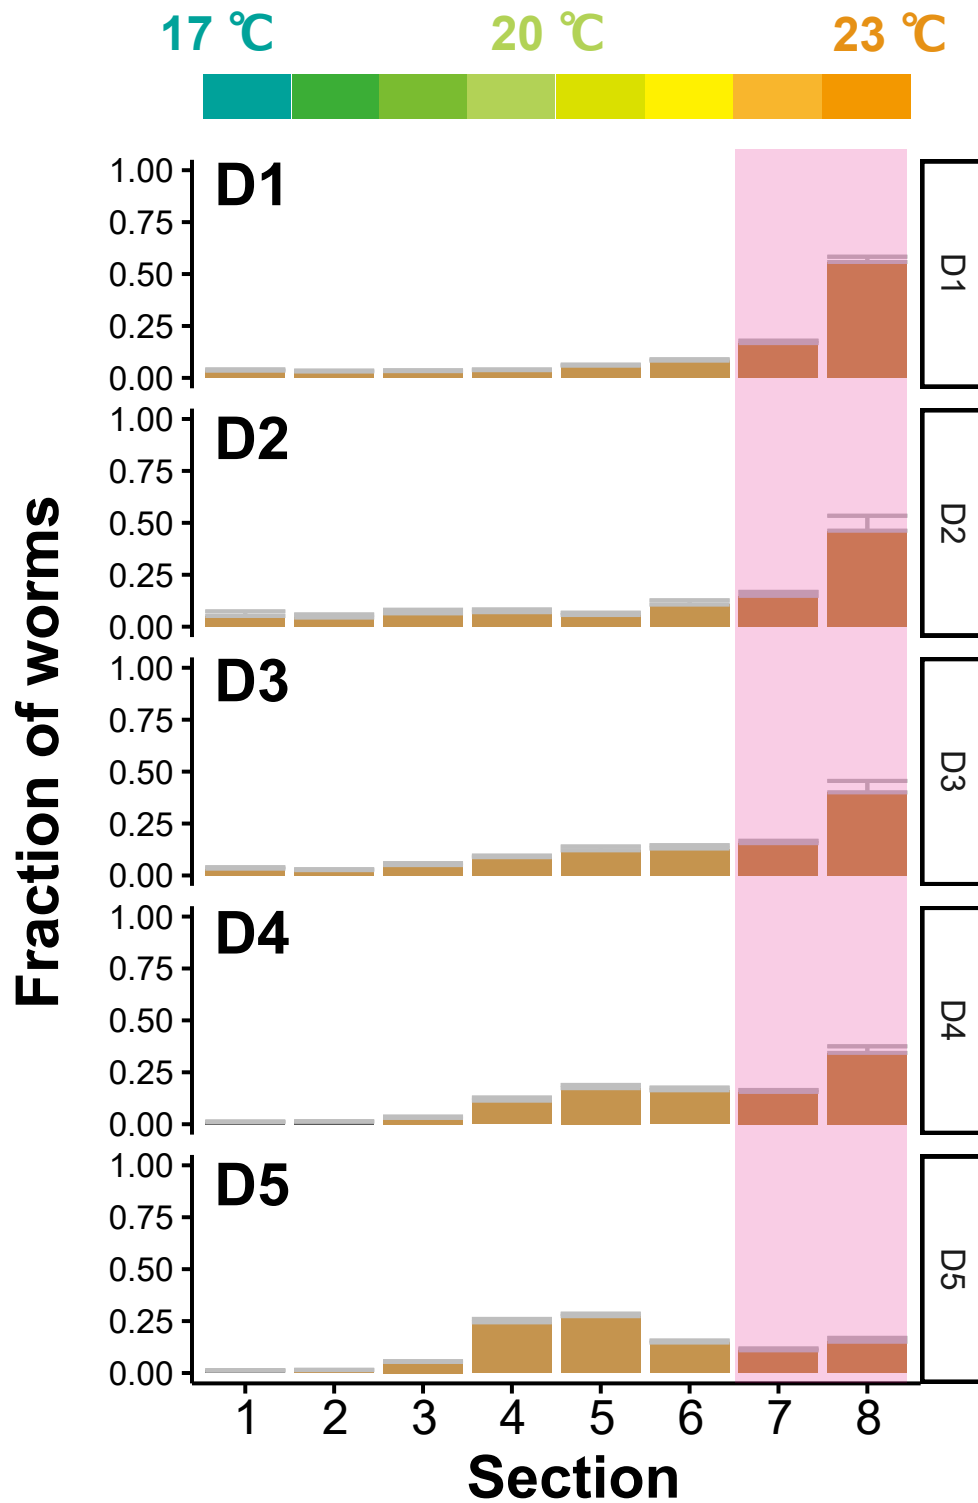

**Figure S2 Distribution of worms on temperature gradient at different age**

Worms were cultivated at  $23 \text{ }^{\circ}\text{C}$  and placed at the center of  $17\text{-}23 \text{ }^{\circ}\text{C}$  gradient. Distribution of worms were shown. Pink rectangles indicate the sections around the  $T_{\text{cult}}$ .

**A**  $T_{cult} = 23\text{ }^{\circ}\text{C}$ ,  $23\text{ }^{\circ}\text{C}$  center

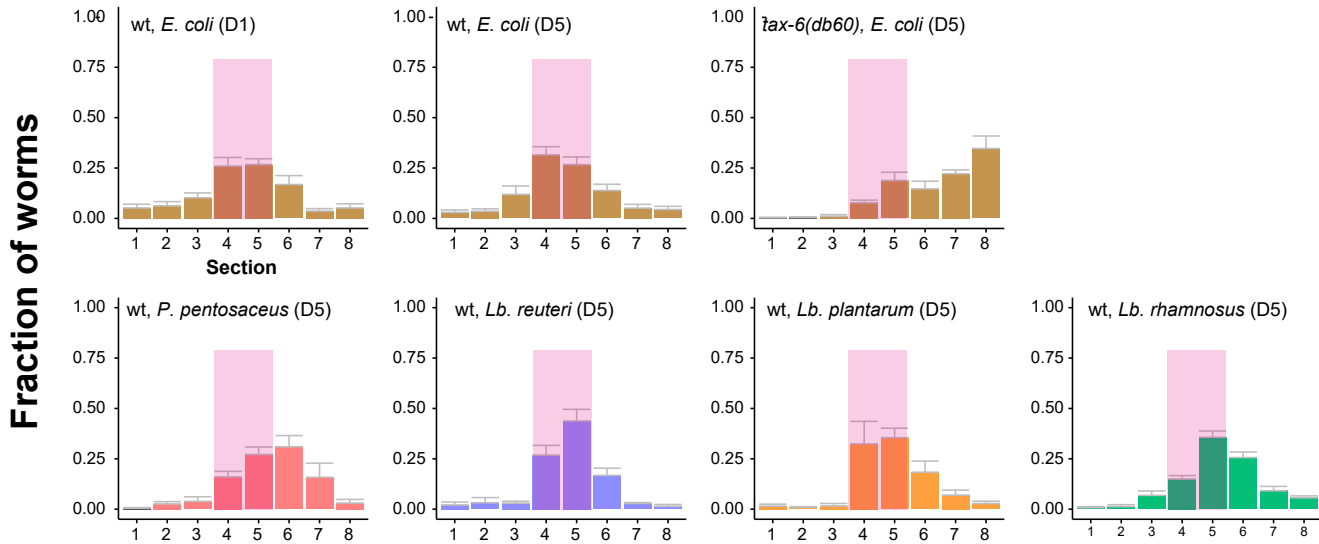

**B**

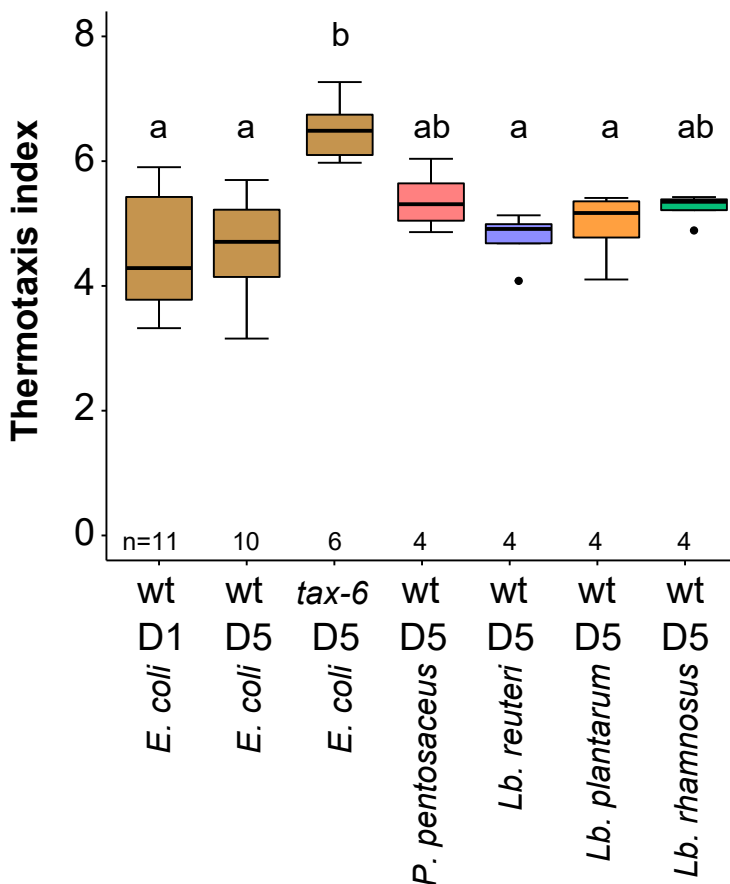

**Figure S3 Worms fed select LAB were not thermophilic**

Worms were cultivated at  $23\text{ }^{\circ}\text{C}$  and placed at the center of  $20\text{-}26\text{ }^{\circ}\text{C}$  gradient. (A) Distribution of worms fed indicated bacteria. Pink rectangles indicate the sections around the  $T_{cult}$ . (B) Box plots summarizing thermotaxis indices of aged worms fed indicated conditions. Numbers of experiments are shown. Statistics: The mean indices marked with distinct alphabets are significantly different ( $p < 0.05$ ) according to One-way ANOVA followed by Tukey–Kramer test.

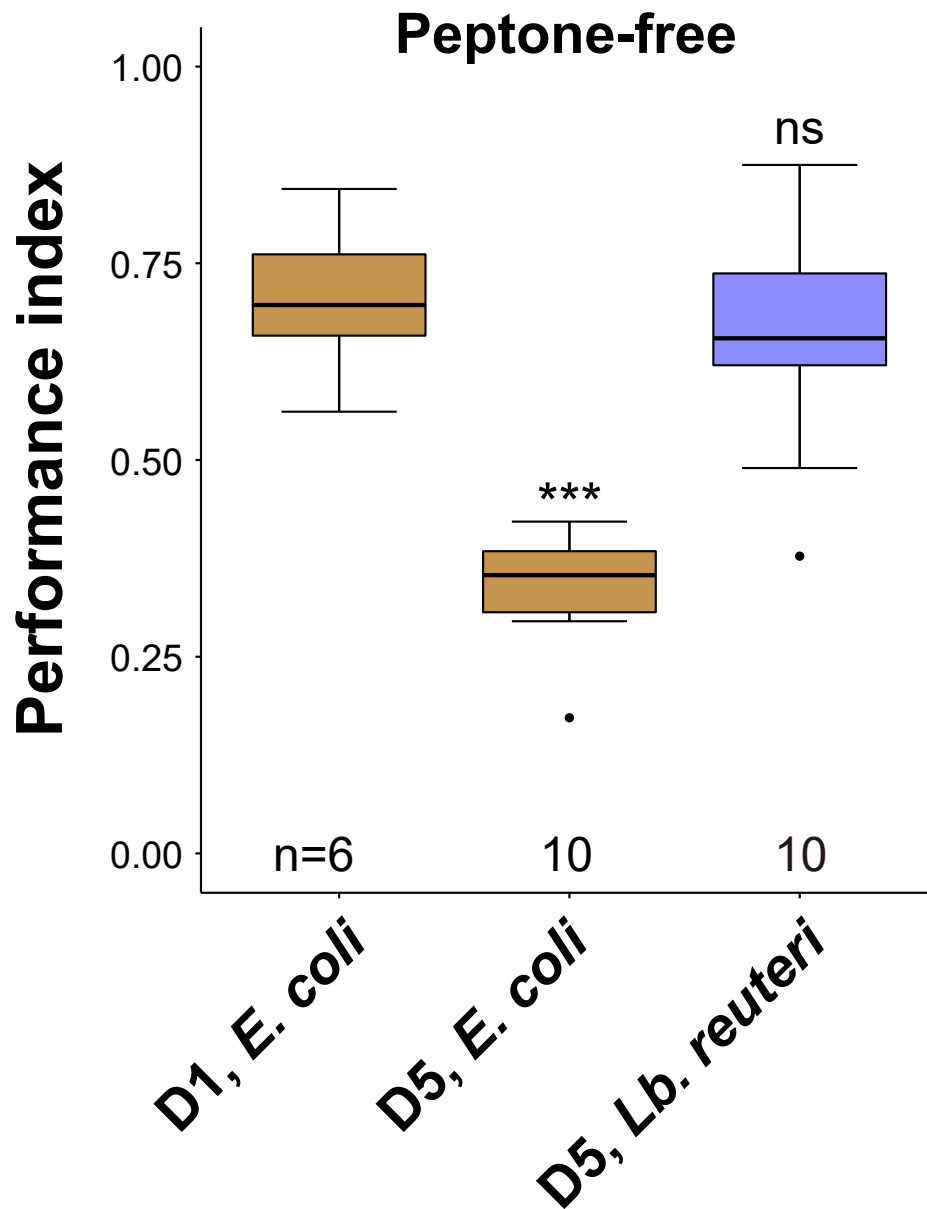

**Figure S4 Peptone-free plates do not affect the beneficial effect of *Lb. reuteri***

Box plots comparing performance indices between worms cultivated on NGM plates without peptone.

Worms were cultivated at 23 °C with *E. coli* or *Lb. reuteri*. Numbers of experiments are shown. Statistics: One-way ANOVA followed by Dunnett's multiple comparison test compared to the D1 control for each condition,  $p^{***}<0.001$ ; ns,  $p>0.05$ .

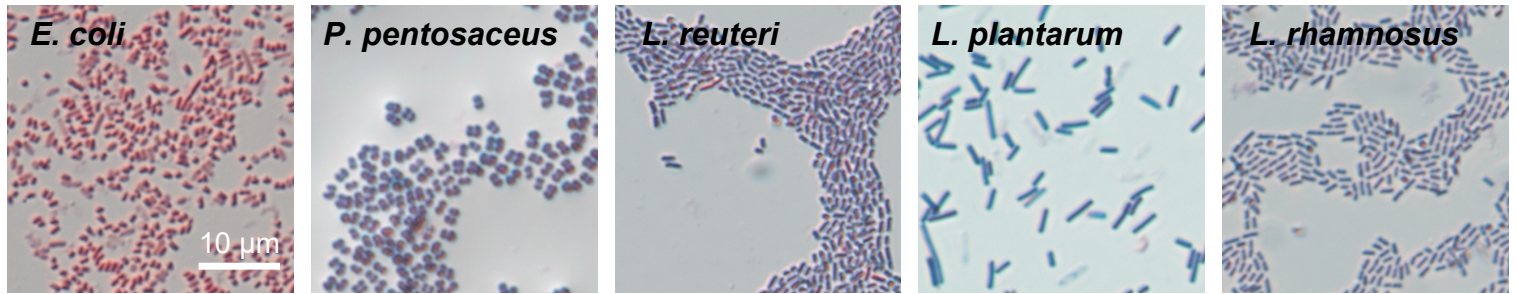**Figure S5 Images of Gram-stained bacteria**

Representative images of Gram-stained *E. coli* and select LAB. *E. coli* and LAB are Gram negative and positive, respectively. Scale bar: 10 µm.
